# Supplementary material for: Resveratrol attenuates doxorubicin-induced meiotic failure through inhibiting oxidative stress and apoptosis in mouse oocytes
Source: publisher site journal article supplement (doi:10.18632/aging.103061), 2020-04-30
Supplement: Supplementary file [file aging-v12i9-103061-supplementary-material-SD2.pdf]

## SUPPLEMENTARY TABLE

Supplementary Table 1. Primer sequences for qRT-PCR.

|                                 | Forward                 | Reverse               |
|---------------------------------|-------------------------|-----------------------|
| <i>Cat</i>                      | ACCAAATACTCCAAGGCAAAGGT | CAAACCCACGAGGGTCCCGA  |
| <i>Sod1</i>                     | GCTGTACCAGTGCAGGTCCTCA  | CATTCCACCTTTGCCCAAGTC |
| <i>Sod2</i>                     | AAAGCGGTGTGCGTGCTGAA    | CAGGTCTCCAACATGCCTCT  |
| <i>Gpx3</i>                     | CCTCAAGTACGTCCGACCTG    | CAATGTCGTTGCGGCACACC  |
| <i><math>\beta</math>-actin</i> | TTGTTACCAACTGGGACG      | GGCATAGAGGTCTTTACGG   |
